# Supplementary material
Source: MDPI journal article supplement (https://www.mdpi.com/2311-5637/8/10/501)
Supplement: s1 [file s1]

Archive with 5 entries (5 files):
- Figure S1 Contents of varietal aroma compounds in wine samples made from different grape varietiesclones.pdf
- Table S1 Content of aroma volatile compounds in wine samples from the Hexi Corridor.xlsx
- Table S2 The OAV values of aroma volatile compounds in Hexi Corridor wine samples.xlsx
- Table S3 MF% of aromatic characteristics of wines made from 16 varietiesclones.pdf
- Table S4 The correlation coefficients of PLSR between wine volatiles and sensory odor descriptors.pdf
