# Supplementary material
Source: MDPI journal article supplement (https://www.mdpi.com/2311-5637/8/10/501)
Supplement: s1 [file s1 › Figure S1 Contents of varietal aroma compounds in wine samples made from different grape varietiesclones.pdf]

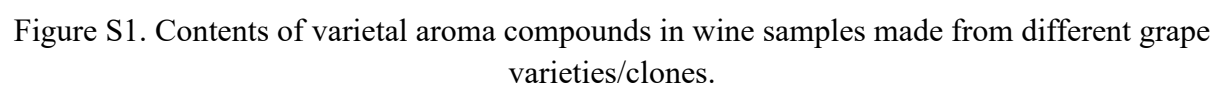

Figure S1. Contents of varietal aroma compounds in wine samples made from different grape varieties/clones.
