# Supplementary material
Source: MDPI journal article supplement (https://www.mdpi.com/2311-5637/8/10/501)
Supplement: s1 [file s1 › Table S1 Content of aroma volatile compounds in wine samples from the Hexi Corridor.xlsx]

## Sheet: Table S1
Table S1 Content of aroma volatile compounds in wine samples from the Hexi Corridor
Compounds (mg/L)	RI	Merlot		Pinot Noir				Cabernet Franc				Cabernet Sauvignon				Malbec
		VCR1	343	VCR9	375	VCR18	792	VCR10	215	678	396	15	169	170	VCR11	598	VCR6
Varietal aroma
C6 compounds
1-Hexanol	1351	470.24±21.68fg	874.07±168.01cdef	1280.67±28.86ab	1115.81±110.61bc	1071.02±114.03bc	1496.81±94.67a	378.01±63.16g	469.84±43.68fg	478.21±83.7fg	423.78±24.52g	593.51±36.06efg	564.69±20.2fg	746.98±4.9def	640.22±50.78efg	713.84±13.28ef	1004.81±5.33bcd
(Z)-3-hexen-1-ol	1387	168.66±2.93bcde	367.39±66.86a	193.1±15.61bcd	234.36±1.81bc	158.09±21.73cdef	246.66±16.47b	66.8±12.62g	111.63±0.85efg	81.93±14.9fg	51.13±9.83g	162.08±0.41cde	154.38±3.94cdef	231.3±5.02bc	148.65±20.02def	156.55±0.84cdef	228.83±1.45bc
(E)-3-hexen-1-ol	1365	4.04±0.67h	15.12±2.79efgh	20.86±0.04defg	16.83±1.35defgh	21.47±3.29def	22.1±1.89def	46.81±9.67ab	30.99±2.23cd	36.97±7.41bc	54.83±2.83a	17.38±0.91defgh	18.41±0.3defgh	19.73±0.82	29.49±5.61cde	6.56±1.32gh	9.84±0.05fgh
C13-norisoprenoids
β-Damascenone	1833	1.44±0.07b	1.56±0.29ab	1.45±0.05ab	1.37±0.01b	1.48±0.05ab	1.37±0.06b	1.57±0.04ab	1.51±0.05ab	1.65±0.04ab	1.44±0.02ab	1.75±0.01ab	1.59±0.06ab	1.81±0.01ab	2.04±0.45ab	2.21±0.51a	1.7±0.11ab
Terpenoids
Citronellyl butyrate	1529	ND	ND	ND	ND	ND	ND	ND	ND	ND	ND	ND	ND	ND	ND	13.34±0.17a	13.17±0.08a
Citronellol	1770	1.02±0.18b	1.23±0.15b	1.11±0.06b	1.51±0.05ab	1.47±0.17ab	1.46±0.09ab	0.86±0.15b	0.77±0.1b	0.11±0.02b	0.42±0.19b	0.74±0.21b	0.99±0.08b	0.81±0.11b	7.74±6.4a	3.05±0.49ab	2.75±0.06ab
Nerol	1805	ND	ND	ND	ND	ND	ND	ND	ND	ND	ND	ND	ND	ND	ND	9±2.57a	6.2±1.4a
Geraniol	1855	6.83±0.53c	7.66±1.85c	6.86±0.17c	7.01±0.05c	7.29±0.23c	7.11±0.03c	ND	ND	ND	ND	ND	ND	ND	ND	18.34±2.98a	12.16±0.74b
Total varietal aroma		652.23±23.16def	1267.02±239.95bc	1504.04±44.71ab	1376.9±113.65b	1260.82±139.5bc	1775.51±113.15a	494.06±85.64f	614.75±42.24ef	598.86±106ef	531.6±36.97f	775.46±36.35def	740.05±16.7def	1000.63±10.61cd	828.14±83.26def	922.89±22.15cde	1279.45±3.36bc
Fermented aroma
Esters
Fatty acid ethyl esters
Ethyl butyrate	1047	114.23±11.61def	149.65±28.64abcde	92.55±1f	117.45±13.8cdef	94.69±14.99f	105.06±4.51ef	126.47±3.25cdef	136.96±1.64bcdef	180.38±7.84ab	187.82±2.99a	123.13±25.66cdef	120.34±3.97cdef	165.86±0.94abc	162.32±18.44abcd	158.54±4.41abcd	159.64±3.8abcd
Ethyl caproate	1232	384.25±48.16bc	803.63±178.91a	432.48±3.06bc	413.85±42.55bc	407±50.61bc	331.96±21.06c	436.72±53.93bc	449.12±39.82bc	400.5±3.78bc	476.08±33.62bc	451.54±85.13bc	508.9±17.43bc	619.08±25.17ab	600.09±46.51ab	565.8±6.68bc	586.31±24.6ab
Ethyl heptanoate	1334	0.27±0.02b	0.51±0.12ab	0.47±0ab	0.49±0.04ab	0.53±0.07ab	0.35±0.03ab	0.65±0.08ab	0.57±0.03ab	0.72±0.14ab	0.53±0.05ab	0.51±0.09ab	0.67±0.04ab	0.54±0.04ab	1.44±1.12ab	0.33±0.01ab	0.37±0.01ab
Ethyl lactate	1350	6775.13±2583.82ab	5252.23±948.75abcd	7218.35±603.23a	5936.97±16.94abc	3374.6±331.44bcd	6882.3±201.07ab	2433.9±389.8cd	3761.21±556.39abcd	4683.24±1582.74abcd	2151.99±118.37d	3463.06±189.72bcd	3745.24±386.49abcd	3599.72±108.68bcd	3551.08±1204.17bcd	2342.6±120.56d	2508.95±272.77cd
Ethyl octanoate	1437	1281.91±125.87e	2526.74±584.28abcd	1941.92±8.63cde	1672.58±159.59de	1849.16±247.71cde	1280.18±88.28e	2188.69±228.32bcde	2177.9±177.07bcde	1993.56±351.18cde	2689.16±413.85abcd	2121.32±232.14bcde	2275.16±133.16bcde	2856.42±159.52abc	3582.48±605.26a	3268.43±68.76ab	3422.9±132.82a
Ethyl nonanoate A	1535	3.29±0.01c	3.6±0.18bc	3.78±0.06bc	3.78±0.03bc	3.76±0.23bc	3.51±0.12bc	3.54±0.05bc	3.45±0.01bc	3.53±0bc	3.58±0.05bc	3.52±0.08bc	3.55±0.04bc	3.57±0.02bc	4.59±0.64a	3.94±0.04abc	4.19±0.18ab
Ethyl 3-hydroxybutyrate B	1522	490.6±13.84ab	446.71±70.36ab	360.11±8.2ab	193.42±6.45b	276.85±77.42ab	364.43±86.68ab	395.34±77.02ab	476.35±82.03ab	489.4±54.71ab	491.3±17.81ab	450.97±51.27ab	463.48±151.01ab	520.65±73.74a	352.4±76.84ab	482.24±149.64ab	311.6±70.37ab
Ethyl decanoate	1639	1083.93±107.69c	1656.96±329.74c	1574.68±9.67c	1236.63±91.37c	1425.53±164.95c	1081.16±82.23c	1499.82±48.45c	1553.04±81.66c	1382.09±23.89c	1671.12±157.25c	1641.34±23.76c	1522.7±104.75c	1772.62±145.85bc	3084.2±597.12a	2656.42±98.67a	2499.97±101.09ab
Diethyl succinate	1682	123.72±19.33a	100.2±22.19a	100±10.33a	100.86±5.71a	112.62±7.34a	96.44±5.37a	88.79±17.92a	103.35±7.05a	114.66±2.09a	94±9.94a	128.96±2.56a	111.07±14.07a	136.71±16.82a	118.92±35.4a	81.93±0.4a	113.69±9.41a
Ethyl 9-decenoate C	1697	298.86±2.36h	327.1±13.06gh	401.23±4.64def	359.74±6.58efg	406±17.3de	354.44±8.23fg	367.31±1.48efg	346.64±7.65gh	360.32±2.64efg	448.57±8.49bcd	347.04±5.66gh	333.58±7.65gh	420.24±12.1cd	492.27±36.53ab	455.5±0.93bc	506.81±11.06a
Ethyl laurate	1848	58.49±10.36abc	54.46±12.95bcde	42.79±1.04bcde	31.31±2de	33.95±3.96cde	30.62±2.37e	45.93±3.41bcde	54.4±2.19bcde	56.09±7.51bcde	51.67±5.28bcde	59.15±2.21abc	48.34±4.13bcde	47.58±5.1bcde	84.17±13.96a	67.6±6.25ab	57.66±3.34bcd
Ethyl palmitate D	2265	41.67±0.88abc	32.69±6.18bcde	36.96±2.58abcd	41.48±1.74abc	36.15±4.92abcd	40.61±5.64abc	33.25±6.31bcde	42.28±4.41abc	28.63±8.03cde	47.69±5.08ab	50.81±3.5a	45.56±1.63ab	36.97±0.67abcd	18.78±1.75e	21.5±1.3de	20.5±0.44de
Ethyl salicylate	1826	5.93±0bc	6.62±0.44bc	5.58±0.02c	5.55±0c	5.42±0.12c	5.52±0.01c	5.58±0.01c	5.55±0.01c	5.55±0.01c	5.65±0.02bc	5.65±0.03bc	5.58±0.01c	5.59±0.01c	22.65±8.97a	15.74±3.98ab	11.25±2.33bc
Ethyl phenylacetate	1804	1.63±0.02a	1.65±0.3a	0.79±0.03a	0.86±0.05a	0.86±0.04a	0.84±0.04a	1.33±0.04a	1.39±0.06a	1.44±0.01a	0.96±0.03a	1.87±0.09a	2.21±0.09a	1.16±0.07a	10.78±11.75a	1.4±0.25a	1.09±0.19a
Acetic acid esters
Ethyl acetate	909	62339.3±4199.51bc	80457.18±17819.77abc	60665.3±1122.89bc	69150.9±8989.02abc	60953.6±8441.72bc	69915.2±3055.55ab	60684.5±6811.56bc	67467±10014.75abc	74207.65±2519.63abc	90990.45±3334.22a	58161.45±8811.19bc	54115.9±2687.15c	83291.5±877.38ab	75888.45±3010.93abc	73094.15±3673.49abc	83966.65±997.66ab
Isobutyl acetate	1019	84.47±6.52fg	163.11±34.31cd	62±0.81fg	95.41±9.11efg	66.47±9.62fg	56.79±1.98g	99.33±0.71efg	80.52±0.01fg	115.11±5.95def	153.72±2.89cd	138.82±24.82cde	169.02±10.07cd	169.68±6.84cd	227.35±25.62ab	242.64±7.98a	181.86±2.9bc
Isoamyl acetate	1122	162.32±18.67bc	433.06±98.02a	7.73±0.14d	19.76±4.27d	10.73±4.66d	13.8±2.14d	164.21±22.14bc	88±3.15cd	120±1.08cd	107.55±7.81cd	412.76±74.12a	517.34±8.33a	252.59±6.4b	473.15±25.37a	494.95±9.29a	410.24±13.6a
Hexyl acetate	1273	3.87±0.54c	14.64±3.29bc	2.65±0.08c	2.68±0.28c	2.32±0.21c	2.93±0.23c	2.85±0.3c	1.69±0.35c	2.37±0.33c	2.24±0.19c	9.29±1.34c	11.15±0.58bc	9.52±0.28c	24.34±14.09ab	16.01±0.01bc	32.16±1.29a
Heptanyl acetate	1373	0.32±0.04b	1.86±0.3ab	0.3±0.05b	0.34±0.06b	0.1±0.01b	0.51±0.22b	0.09±0.03b	0.24±0.08b	0.53±0.15b	0.7±0.13b	1.33±0.27b	1.59±0.09b	2.03±0.07ab	5.94±4.09a	2.87±0ab	2.58±0.29ab
Phenethyl acetate	1830	12.5±0.15abc	21.78±10.46a	1.72±0c	2.02±0.04c	1.79±0.18c	1.91±0.06c	5.23±0.31c	4.8±0.12c	5.47±0.06c	3.4±0.3c	18.53±0.26ab	20.14±1.2a	7.95±0.58bc	13.37±4.97abc	10.56±0.38abc	7.12±0.07bc
Other esters
Methyl octanoate	1390	0.82±0.09bc	1.72±0.46abc	1.3±0abc	0.85±0.07bc	1.18±0.2abc	0.62±0.08c	1.42±0.22abc	1.3±0.13abc	0.98±0.22bc	1.27±0.19abc	0.99±0.2bc	1.11±0.07bc	2.55±0.13ab	3.08±1.77a	1.89±0.02abc	2.47±0.09abc
Isopentyl hexanoate	1458	3.55±0.02cd	4.27±0.25abcd	3.67±0.01cd	3.56±0.02cd	3.65±0.11cd	3.45±0.08d	4.1±0.08bcd	4.08±0bcd	4.12±0.16bcd	3.78±0.06bcd	4.29±0.32abcd	4.67±0.08ab	4.35±0.08abcd	5.23±0.86a	4.5±0.02abc	4.49±0.07abc
Isobutyl caprylate	1348	2.07±0.4c	2.35±0.49c	2.39±0.1c	2.1±0.1c	2.28±0.27c	2.01±0.34c	2.09±0.15c	1.84±0.04c	2.11±0.1c	2.11±0.07c	2.08±0.34c	2.16±0.03c	2.68±0.4bc	4±0.07a	3.7±0.1a	3.51±0.27ab
Methyl caprate E	1588	3.19±0bc	3.3±0.07bc	3.29±0.01bc	3.2±0.01bc	3.24±0.04bc	3.18±0.02c	3.31±0.02bc	3.34±0.01b	3.27±0bc	3.28±0.01bc	3.28±0.02bc	3.27±0.03bc	3.51±0.04bc	3.55±0.1bc	3.5±0.02a	3.58±0.05bc
Isoamyl caprylate	1659	3.22±0.22c	5.29±0.67c	3.47±0.1c	2.64±0.11c	3.44±0.36c	2.43±0.2c	3.98±0.05c	3.46±0.16c	3.89±0.06c	3.55±0.03c	4.93±0.48c	5.39±0.49c	4.96±0.47c	12.53±2.67a	10.07±0.49ab	9.36±0.06b
Methyl salicylate	1792	4.24±0.01b	6.27±1.04a	0.12±0.07d	3.5±0.03bc	3.25±0.04bc	3.31±0.04bc	3.3±0.03bc	3.09±0.15c	0.88±0.06d	3.53±0.04bc	0±0d	0±0d	0±0d	0±0d	0±0d	0±0d
Higher alcohols
Isobutanol	1103	42441±6357.88ab	42682.65±6194.33ab	35468.15±341.89bc	54770.11±2881.01a	35902±5221.98bc	41150±1058.11ab	34332.8±3187.78bc	39073.15±8718.7bc	37021.8±2303.61bc	36242.05±117.17bc	37536.8±1136.46bc	40316.9±826.61ab	35036.6±1241.82bc	38114.8±2261.33bc	44755.05±2434.64ab	25159.2±186.82c
1-Butanol F	1161	2300.77±306.81b	1780.8±236.51bcd	1582.76±43.58d	3463.21±91.41a	1541.27±184.92d	3388.68±118.77a	1653.32±151.72cd	2256.2±341.32bc	2064.16±7bcd	2340.09±17.83b	1800.98±69.1bcd	1541.46±69.7d	1567.02±55.18d	1452.93±149.98d	1666.42±52.47cd	1484.74±20.94d
Isoamyl alcohol	1130	106910.95±11670.16abcd	140316.5±27526.96a	61210.85±1503.38f	75449.95±9105.77def	61973.1±7719.2f	76714.1±4062.47def	98253.7±13822.95bcdef	108512.5±2131.93abcd	103475.5±3768.17abcde	85698.75±3985.61def	137298.5±17626.05ab	129875±3044.8abc	86670±1076.78def	94115±7988.33cdef	101908.15±4000.6abcdef	65390.8±560.03ef
4-Methyl-1-pentanol	1316	23.79±0.5abcd	28.37±3.77a	7.67±1.29fg	9.48±0.04fg	6.88±1.4g	10.95±2.93efg	18.89±3.61cde	18.33±2.45cde	19.28±3.89bcde	8.92±2.15fg	26.73±0.36abc	27.75±2.75ab	15.67±1.6def	15.63±1.01defg	12.52±0.21efg	9.48±0.01fg
3-Methyl-1-pentanol	1328	54.68±2.21ab	56±12.31a	8.57±1.33e	13.05±1.81e	8.28±2.02e	15.28±2.38e	45.58±8.7abc	45.23±3.59abcd	55.35±11.14ab	13.72±1.85e	66.8±1.03a	65.92±5.15a	29.04±0.3bcde	47.03±17.57abc	26.04±1.22cde	18.61±0.31de
N-heptanol	1455	13.23±0.86cd	20.17±4.31abc	17.32±0.95abcd	20.51±1.37abc	18.4±2.12abcd	17.69±2.2abcd	14.86±3.01abcd	15.45±0.18abcd	18.53±2.5abcd	21.83±1.71a	13.4±1.04bcd	11.4±0.75d	21.03±0.22ab	19.87±2.65abc	18.33±0.63abcd	12.99±0.7cd
1-Octanol	1557	4.16±0.4e	5.38±1.18de	9.31±0.57ab	6.45±0.24bcde	9.95±0.88a	5.91±0.25cde	4.46±0.99e	3.34±0e	4.98±0.55de	6.43±0.05bcde	6.08±0.64cde	5.02±0.38de	9.72±0.18a	8.86±2.33abc	8.16±0.1abcd	10.58±0.47a
Decyl alcohol	1765	1.67±0.11b	1.95±0.18b	1.7±0.67b	2.05±0.03b	2.31±0.18b	1.79±0.04b	1.8±0.05b	1.57±0.07b	1.74±0.04b	1.97±0.13b	1.81±0.06b	1.66±0.05b	2.34±0.09ab	4.79±2.34	2.75±0.17ab	2.86±0.09ab
Benzyl alcohol	1892	164.54±28.59bcd	164.72±48.81bcd	164.38±27.77bcd	207.19±7.07ab	189.56±2.6ab	265.95±33.27a	52.1±11.28f	68.06±7.77ef	51.88±1.98f	54.79±5.73f	165.07±16.04bcd	151.33±31.15bcde	168.52±41.55bc	160.3±19.88bcde	76.15±0.37cdef	71.74±6.6def
Phenethyl alcohol	1928	11730.8±1629.6ab	8611.61±2572.3bc	2043.56±353.74d	2485.25±134.55d	2348.36±3.97d	2996.22±477.7cd	6249.71±1624.87bcd	8802.04±930.47bc	8454.31±617.47bc	3741.81±635cd	15136.9±1423.55a	15659.4±3832.8a	6716.86±1811.83bcd	4638.77±836.09cd	4437.42±131.28cd	2370.11±153.11d
Carbonyl compounds
1-Nonanal	1394	0.04±0.01d	0.91±0.27ab	1.35±0.04a	0.87±0.02ab	0.21±0.02cd	1.15±0.25ab	0.11±0.04d	0.02±0.01d	0.02±0.01d	0.95±0.37ab	0.07±0.04d	0.05±0.01d	0.74±0.25bc	0.03±0.01d	0.02±0.01d	0.02±0.01d
Decanal	1499	2.86±0.11a	3.83±0.08a	4.35±2.4a	3.36±0.89a	3.18±1.16a	3.62±2.01a	3.16±0.63a	2.6±0.89a	4.31±0.11a	3.4±1a	2.65±0.21a	3.21±0.36a	3.57±0.77a	3.81±0.57a	2.49±0.05a	3.29±1.15a
Benzaldehyde	1534	0.29±0.03c	4.55±0.8b	0.06±0.01c	25.44±0.48a	1.01±0.03c	4.6±0.43b	0.29±0.01c	0.03±0.01c	0.02±0.01c	0.02±0.01c	0.02±0.01c	0.03±0.03c	0.04±0.02c	0.03±0.01c	0.02±0.01c	0.03±0.01c
Fatty acids
Isobutyric acid	1590	1579.3±308.53a	1177.61±95.51abcd	987.37±106.98cd	1256.38±25.01abcd	1017.81±74.92cd	1094.73±19.18abcd	1071.41±185.06abcd	1464.34±99.58abc	1317.86±223.95abcd	1023.07±95.82bcd	1572.18±13.24ab	1611.21±152.13a	1340.46±10.68abc	1249.31±223.69aabcd	1333.18±29.75	769.69±35.68d
Isovaleric acid	1683	907.9±226.17ab	526.73±68.89cd	198.61±32.11e	242.61±5.08de	232.57±10.72de	266.46±19.48de	453.75±117.83cde	623.1±31.22bc	635.36±79.54bc	299.03±23.26de	971.25±33.93a	1032.03±119.64a	500.61±62.66cde	404.71±48.38cde	367.58±5.29cde	230.53±12.76de
Hexanoic acid	1860	331.46±431.93b	363.31±80.36b	337.93±63.65b	298.19±12.23b	392.64±6.14ab	288.8±37.42b	332.2±77.25b	400.94±84.1ab	427.23±35ab	354.48±48.12b	690.64±27.7ab	650.72±131.16ab	898.07±74.67a	576.07±142.77ab	418.44±9.08ab	584±64.69ab
Octanoic acid	2075	512.71±37.37abcd	409.24±86.22bcd	341.3±24.53cd	317.32±2.28d	382.39±1.91cd	300.57±18.34d	354.05±35.27cd	344.7±22.97cd	407.44±13.49bcd	349.4±32.09cd	519.27±4.18abcd	511.33±78.54abcd	678.84±173.3a	728.67±57.11a	628.26±32.05ab	566.87±1.98abc
Decanoic acid	2292	615.85±144.42a	356.69±155.66ab	210.89±32.48b	169.43±8.46b	207.55±10.36b	162.91±16.31b	199.1±25.41b	210.26±43.38b	292.8±0.55ab	203.09±13.24b	464.51±69.12ab	481.28±107.78ab	646.33±250.44a	461.42±95.67ab	292.79±22.38ab	277.54±13.87ab
Total fermented aroma		240879.73±4431.81abc	288988.56±57253.5a	175561.71±4252.51c	218142.73±21524.38abc	173316.62±22451.86bc	207272.9±7608.48bc	211643.02±26920.83abc	238613.39±16500.97abc	238419.04±3982.04abc	229959.49±6859.11abc	263880.27±8516.34ab	255983.79±11936.3ab	228243.44±303.85abc	230749.15±17388.03abc	239960.51±10183.7abc	191792.01±2111.06bc
Total aroma		241531.96±4454.97abc	290255.58±57493.45a	177065.76±4297.22c	219519.63±21638.04abc	174577.45±22591.36c	209048.41±7721.63bc	212137.08±27006.46bc	239228.14±16543.21abc	239017.9±4088.04abc	230491.09±6896.08abc	264655.73±8552.69ab	256723.83±11953ab	229244.07±314.47abc	231577.29±17471.29abc	240883.4±10205.85abc	193071.45±2107.7bc
Different letters (a-j) in a line indicate a significant difference, using ANOVA and Duncan's test, (p < 0.05).
Aroma compounds followed by bold italic capital letters (A-F) were those without pure references: A: quantified with isopentyl hexanoate; B: quantified with ethyl lactate; C: quantified with ethyl decanoate; D: quantified with ethyl dodecanoate; E: quantified with isopentyl hexanoate; F: quantified with isobutanol.
ND means no detected
