# Supplementary material
Source: MDPI journal article supplement (https://www.mdpi.com/2311-5637/8/10/501)
Supplement: s1 [file s1 › Table S2 The OAV values of aroma volatile compounds in Hexi Corridor wine samples.xlsx]

## Sheet: Table S2
Table S2 The OAV values of aroma volatile compounds in Hexi Corridor wine samples
Compounds	Odor Threshold (μg/L)	Threshold measurement media	Odor descriptor	Merlot		Pinot Noir				Cabernet Franc				Cabernet Sauvignon				Malbec
				VCR1	343	VCR9	375	VCR18	792	VCR10	215	678	396	15	169	170	VCR11	598	VCR6
Varietal aroma
C6 compounds
1-Hexanol	1300a	14 % (v/v) ethanol; tartaric acid to pH 3.5	green, grass	0.43	0.79	1.16	1.01	0.97	1.36	0.34	0.43	0.43	0.39	0.54	0.51	0.68	0.58	0.65	0.91
(Z)-3-hexen-1-ol	1900b	water	green, cypress	0.42	0.92	0.48	0.59	0.4	0.62	0.17	0.28	0.2	0.13	0.41	0.39	0.58	0.37	0.39	0.57
(E)-3-hexen-1-ol	231.9c	water	green	0.01	0.04	0.05	0.04	0.05	0.06	0.12	0.08	0.09	0.14	0.04	0.05	0.05	0.07	0.02	0.02
C13-norisoprenoids
β-Damascenone	7d	red wine	sweet,apple	28.83	31.16	28.92	27.43	29.66	27.32	31.47	30.22	32.99	28.9	35.02	31.74	36.1	40.8	44.13	34.02
Terpenoids
Citronellol	100a	14 % (v/v) ethanol; tartaric acid to pH 3.5	floral, apple	0.01	0.01	0.01	0.02	0.01	0.01	0.01	0.01	0	0	0.01	0.01	0.01	0.08	0.03	0.03
Nerol	500a	14 % (v/v) ethanol; tartaric acid to pH 3.5	orange, rose	-*	-	-	-	-	-	-	-	-	-	-	-	-	-	0.0180094	0.0124
Geraniol	20e	10 % water/ethanol, tartaric acid 5 g/l, pH 3.2	rose, geranium	0.34	0.38	0.34	0.35	0.36	0.36	-	-	-	-	-	-	-	-	0.92	0.61
Fermented aroma
Esters
Fatty acid ethyl esters
Ethyl butyrate	600a	14 % (v/v) ethanol; tartaric acid to pH 3.5	strawberry, apple, banana	5.71	7.48	4.63	5.87	4.73	5.25	6.32	6.85	9.02	9.39	6.16	6.02	8.29	8.12	7.93	7.98
Ethyl caproate	100a	14 % (v/v) ethanol; tartaric acid to pH 3.5	floral, fruity	27.45	57.4	30.89	29.56	29.07	23.71	31.19	32.08	28.61	34.01	32.25	36.35	44.22	42.86	40.41	41.88
Ethyl heptanoate	300a	14 % (v/v) ethanol; tartaric acid to pH 3.5	brandy, fruity	0	0	0	0	0	0	0	0	0	0	0	0	0	0.01	0	0
Ethyl lactate	146000a	14 % (v/v) ethanol; tartaric acid to pH 3.5	lactic acid, raspberry	0.48	0.38	0.52	0.42	0.24	0.49	0.17	0.27	0.33	0.15	0.25	0.27	0.26	0.25	0.17	0.18
Ethyl octanoate	600a	14 % (v/v) ethanol; tartaric acid to pH 3.5	pineapple, pear, floral	256.38	505.35	388.38	334.52	369.83	256.04	437.74	435.58	398.71	537.83	424.26	455.03	571.28	716.5	653.69	684.58
Ethyl nonanoate	377f	water	banana, grape	0	0	0	0	0	0	0	0	0	0	0	0	0	0	0	0
Ethyl 3-hydroxybutyrate	1000a	14 % (v/v) ethanol; tartaric acid to pH 3.5	grape	0.02	0.02	0.02	0.01	0.01	0.02	0.02	0.02	0.02	0.02	0.02	0.02	0.03	0.02	0.02	0.02
Ethyl decanoate	510g	14 % v/v ethanol/water	waxy, fruity	5.42	8.28	7.87	6.18	7.13	5.41	7.5	7.77	6.91	8.36	8.21	7.61	8.86	15.42	13.28	12.5
Diethyl succinate	100000g	14 % v/v ethanol/water	winelike	0	0	0	0	0	0	0	0	0	0	0	0	0	0	0	0
Ethyl 9-decenoate	100h	12 % v/v ethanol/water	quince, floral	2.99	3.27	4.01	3.6	4.06	3.54	3.67	3.47	3.6	4.49	3.47	3.34	4.2	4.92	4.56	5.07
Ethyl laurate	500a	14 % (v/v) ethanol; tartaric acid to pH 3.5	fruity, floral	0.04	0.01	0.01	0.01	0.01	0.01	0.01	0.01	0.01	0.01	0.01	0.01	0.01	0.02	0.02	0.01
Ethyl palmitate	1000a	14 % (v/v) ethanol; tartaric acid to pH 3.5	mild waxy	0.03	0.02	0.02	0.03	0.02	0.03	0.02	0.03	0.02	0.03	0.03	0.03	0.02	0.01	0.01	0.01
Ethyl salicylate	84e	10 % water/ethanol, tartaric acid 5 g/L, pH 3.2	minty	0.07	0.08	0.07	0.07	0.06	0.07	0.07	0.07	0.07	0.07	0.07	0.07	0.07	0.27	0.19	0.13
Ethyl phenylacetate	73i	red wine		0.01	0.01	0	0	0	0	0.01	0.01	0.01	0	0.01	0.01	0	0.04	0.01	0
Acetic acid esters
Ethyl acetate	15000a	14 % (v/v) ethanol; tartaric acid to pH 3.5	pineapple, fruit	8.31	10.73	8.09	9.22	8.13	9.32	8.09	9	9.89	12.13	7.75	7.22	11.11	10.12	9.75	11.2
Isobutyl acetate	2100j	dearomatized red wine	drupe	0.05	0.1	0.04	0.06	0.04	0.04	0.06	0.05	0.07	0.1	0.09	0.11	0.11	0.14	0.15	0.11
Isoamyl acetate	30k	14 % ethanolic solution	banana	5.41	14.44	0.26	0.66	0.36	0.46	5.47	2.93	4	3.59	13.76	17.24	8.42	15.77	16.5	13.67
Hexyl acetate	670j	dearomatized red wine	pear, fruit	0	0.01	0	0	0	0	0	0	0	0	0.01	0.01	0.01	0.02	0.01	0.02
Phenethyl acetate	250k	14 % ethanolic solution	pleasant, floral, fruity	0.05	0.09	0.01	0.01	0.01	0.01	0.02	0.02	0.02	0.01	0.07	0.08	0.03	0.05	0.04	0.03
Other esters
Methyl octanoate	200f	water	sweet orange, fruit	0	0.01	0.01	0	0.01	0	0.01	0.01	0	0.01	0	0.01	0.01	0.02	0.01	0.01
Isoamyl caprylate	125l	10 % water/ethanol, tartaric acid 5 g/L, pH 3.2	fruit, brandy	0.03	0.04	0.03	0.02	0.03	0.02	0.03	0.03	0.03	0.03	0.04	0.04	0.04	0.1	0.08	0.07
Methyl salicylate	40m	ethanol/water	holly leaf	0.11	0.16	0	0.09	0.08	0.08	0.08	0.08	0.02	0.09	0	0	0	0	0	0
Higher alcohols
Isobutanol	82000a	14 % (v/v) ethanol; tartaric acid to pH 3.5	alcohol, winelike, nail polish	0.57	0.57	0.47	0.73	0.48	0.55	0.46	0.52	0.49	0.48	0.5	0.54	0.47	0.51	0.6	0.34
1-Butanol	160000a	14 % (v/v) ethanol; tartaric acid to pH 3.5	medicinal	0.02	0.12	0.11	0.23	0.1	0.23	0.11	0.15	0.14	0.16	0.12	0.1	0.1	0.1	0.11	0.1
Isoamyl alcohol	65000a	14 % (v/v) ethanol; tartaric acid to pH 3.5	alcohol, nail polish	3.56	4.68	2.04	2.51	2.07	2.56	3.28	3.62	3.45	2.86	4.58	4.33	2.89	3.14	3.4	2.18
4-Methyl-1-pentanol	5000h	12 % v/v ethanol/water	almond, toasted	0	0	0	0	0	0	0	0	0	0	0	0	0	0	0	0
3-Methyl-1-pentanol	50000n	11% (v/v) ethanol; tartaric acid 5 g/L, pH 3.4	pungent, winelike, cocoa, green	0.11	0.11	0.02	0.03	0.02	0.03	0.09	0.09	0.11	0.03	0.13	0.13	0.06	0.09	0.05	0.04
N-heptanol	2500g	14 % v/v ethanol/water	grape, sweet	0.07	0.01	0.01	0.01	0.01	0.01	0.01	0.01	0.01	0.01	0.01	0.01	0.01	0.01	0.01	0.01
1-Octanol	40o	12% (v/v) ethanol; tartaric acid 5 g/L, pH 3.2	jasmine, Lemon	0.03	0.04	0.08	0.05	0.08	0.05	0.04	0.03	0.04	0.05	0.05	0.04	0.08	0.07	0.07	0.09
Decyl alcohol	500a	14 % (v/v) ethanol; tartaric acid to pH 3.5	cucumber	0	0	0	0.01	0.01	0	0	0	0	0	0	0	0.01	0.01	0.01	0.01
Benzyl alcohol	200000e	10 % water/ethanol, tartaric acid 5 g/L, pH 3.2	roasted, fruity	0.08	0.08	0.08	0.1	0.09	0.13	0.03	0.03	0.03	0.03	0.08	0.08	0.08	0.08	0.04	0.04
Phenethyl alcohol	14000p	12 % v/v ethanol, 5 g/L tartaric acid, pH 3.5	rose, floral	0.84	0.62	0.15	0.18	0.17	0.21	0.45	0.63	0.6	0.27	1.08	1.12	0.48	0.33	0.32	0.17
Carbonyl compounds
1-Nonanal	45.5c	water	citrus	0	0.06	0.09	0.06	0.01	0.08	0.01	0	0	0.06	0	0	0.05	0	0	0
Decanal	1.25q	13% (v/v) ethanol; tartaric acid 5 g/L, pH 3.2	green, fresh	0.29	0.38	0.44	0.34	0.32	0.36	0.32	0.26	0.43	0.34	0.27	0.32	0.36	0.38	0.25	0.33
Benzaldehyde	5000r	14 % ethanolic solution	roast, almond	0	0	0	0.01	0	0	0	0	0	0	0	0	0	0	0	0
Fatty acids
Isobutyric acid	20000r	14 % ethanolic solution	butter, cheese	0.75	0.56	0.47	0.6	0.48	0.52	0.51	0.7	0.63	0.49	0.75	0.77	0.64	0.59	0.63	0.37
Isovaleric acid	1500a	14 % (v/v) ethanol; tartaric acid to pH 3.5	fatty, rancid	27.18	15.77	5.95	7.26	6.96	7.98	13.59	18.66	19.02	8.95	29.08	30.9	14.99	12.12	11.01	6.9
Hexanoic acid	8500a	14 % (v/v) ethanol; tartaric acid to pH 3.5	green	0.79	0.87	0.8	0.71	0.93	0.69	0.79	0.95	1.02	0.84	1.64	1.55	2.14	1.37	1	1.39
Octanoic acid	8800r	14 % ethanolic solution	fatty, rancid, harsh, cheese	1.03	0.82	0.68	0.63	0.76	0.6	0.71	0.69	0.81	0.7	1.04	1.02	1.36	1.46	1.26	1.13
Decanoic acid	15000r	14 % ethanolic solution	rancid, cheese	0.62	0.36	0.21	0.17	0.21	0.16	0.2	0.21	0.29	0.2	0.46	0.48	0.65	0.46	0.29	0.28
* - means not detected
a (Moyano et al., 2002)
b (Jaeger et al., 2010)
c (Giri et al., 2010)
d (Pineau et al., 2007)
e (Escudero et al., 2007)
f (Pino & Mesa, 2006)
g (Chaves et al., 2007)
h (Tao et al., 2009)
i (Tat et al., 2007)
j (Pineau et al., 2009)
k (Moyano et al., 2010)
l (Escudero et al., 2004)
m (Buttery et al., 1969)
n (Ferreira, et al., 2000)
o (Peng et al., 2013)
p (Ferreira et al., 1998)
q (Culleré et al., 2011)
r (Moreno et al., 2005)
Reference
Buttery, R. G., Seifert, R. M., Guadagni, D. G., & Ling, L. C. (1969). Characterization of some volatile constituents of bell peppers. Journal of Agricultural and Food Chemistry, 17(6), 1322-1327. http://doi.org/10.1021/jf60166a061
Chaves, M., Zea, L., Moyano, L., & Medina, M. (2007). Changes in Color and Odorant Compounds during Oxidative Aging of Pedro Ximenez Sweet Wines. Journal of Agricultural and Food Chemistry, 55(9), 3592-3598. http://doi.org/10.1021/jf063506v
Culleré, L., Ferreira, V., & Cacho, J. (2011). Analysis, occurrence and potential sensory significance of aliphatic aldehydes in white wines. Food Chemistry, 127(3), 1397-1403. http://doi.org/https://doi.org/10.1016/j.foodchem.2011.01.133
Escudero, A., Campo, E., Fariña, L., Cacho, J., & Ferreira, V. (2007). Analytical Characterization of the Aroma of Five Premium Red Wines. Insights into the Role of Odor Families and the Concept of Fruitiness of Wines. Journal of Agricultural and Food Chemistry, 55(11), 4501-4510. http://doi.org/10.1021/jf0636418
Escudero, A., Gogorza, B., Melús, M. A., Ortín, N., Cacho, J., & Ferreira, V. (2004). Characterization of the Aroma of a Wine from Maccabeo. Key Role Played by Compounds with Low Odor Activity Values. Journal of Agricultural and Food Chemistry, 52(11), 3516-3524. http://doi.org/10.1021/jf035341l
Ferreira, V., Ardanuy, M., López, R., & Cacho, J. F. (1998). Relationship between Flavor Dilution Values and Odor Unit Values in Hydroalcoholic Solutions:? Role of Volatility and a Practical Rule for Its Estimation. Journal of Agricultural and Food Chemistry, 46(10), 4341-4346. http://doi.org/10.1021/jf980144l
Ferreira, V., López, R., & Cacho, J. F. (2000). Quantitative determination of the odorants of young red wines from different grape varieties. Journal of the Science of Food and Agriculture, 80(11), 1659-1667. http://doi.org/https://doi.org/10.1002/1097-0010(20000901)80:11<1659::AID-JSFA693>3.0.CO;2-6
Giri, A., Osako, K., & Ohshima, T. (2010). Identification and characterisation of headspace volatiles of fish miso, a Japanese fish meat based fermented paste, with special emphasis on effect of fish species and meat washing. Food Chemistry, 120(2), 621-631. http://doi.org/https://doi.org/10.1016/j.foodchem.2009.10.036
Jaeger, S. R., Mcrae, J. F., Salzman, Y., Williams, L., & Newcomb, R. D. (2010). A preliminary investigation into a genetic basis for cis-3-hexen-1-ol odour perception: A genome-wide association approach. Food Quality and Preference, 21(1), 121-131. http://doi.org/https://doi.org/10.1016/j.foodqual.2009.08.011
Moreno, J. A., Zea, L., Moyano, L., & Medina, M. (2005). Aroma compounds as markers of the changes in sherry wines subjected to biological ageing. Food Control, 16(4), 333-338. http://doi.org/https://doi.org/10.1016/j.foodcont.2004.03.013
Moyano, L., Zea, L., Moreno, J. A., & Medina, M. (2010). Evaluation of the Active Odorants in Amontillado Sherry Wines during the Aging Process. Journal of Agricultural and Food Chemistry, 58(11), 6900-6904. http://doi.org/10.1021/jf100410n
Moyano, L., Zea, L., Moreno, J., & Medina, M. (2002). Analytical Study of Aromatic Series in Sherry Wines Subjected to Biological Aging. Journal of Agricultural and Food Chemistry, 50(25), 7356-7361. http://doi.org/10.1021/jf020645d
Peng, C., Wen, Y., Tao, Y., & Lan, Y. (2013). Modulating the Formation of Meili Wine Aroma by Prefermentative Freezing Process. Journal of Agricultural and Food Chemistry, 61(7), 1542-1553. http://doi.org/10.1021/jf3043874
Pineau, B., Barbe, J., Van Leeuwen, C., & Dubourdieu, D. (2007). Which impact for beta-damascenone on red wines aroma? Journal of Agricultural and Food Chemistry, 55(10), 4103-4108. http://doi.org/10.1021/jf070120r
Pineau, B., Barbe, J., Van Leeuwen, C., & Dubourdieu, D. (2009). Examples of Perceptive Interactions Involved in Specific "Red-" and "Black-berry" Aromas in Red Wines. Journal of Agricultural and Food Chemistry, 57(9), 3702-3708. http://doi.org/10.1021/jf803325v
Pino, J. A., & Mesa, J. (2006). Contribution of volatile compounds to mango (Mangifera indica L.) aroma. Flavour and Fragrance Journal, 21(2), 207-213. http://doi.org/https://doi.org/10.1002/ffj.1703
Tao, Y. S., Liu, Y. Q., & Li, H. (2009). Sensory characters of Cabernet Sauvignon dry red wine from Changli County (China). Food Chemistry, 114(2), 565-569. https://doi.org/10.1016/j.foodchem.2008.09.087
Tat, L., Comuzzo, P., Battistutta, F., & Zironi, R. (2007). Sweet-like Off-flavor in Aglianico del Vulture Wine:? Ethyl Phenylacetate as the Mainly Involved Compound. Journal of Agricultural and Food Chemistry, 55(13), 5205-5212. http://doi.org/10.1021/jf0637067
