# Supplementary material
Source: MDPI journal article supplement (https://www.mdpi.com/2311-5637/8/10/501)
Supplement: s1 [file s1 › Table S3 MF% of aromatic characteristics of wines made from 16 varietiesclones.pdf]

Table S3 MF% of aromatic characteristics of wines made from 16 varieties/clones.

| Variety            | clone | floral          | black berry   | green          | red berry    | spice        |
|--------------------|-------|-----------------|---------------|----------------|--------------|--------------|
| Merlot             | VCR1  | 74.74±1.78a     | 31±1.41e      | 14.07±0.1ij    | 85.57±0.6a   | 68.64±0.91a  |
|                    | 343   | 37.32±3.79defgh | 29±1.41e      | 17±4.24hi      | 79.93±6.97ab | 51±5.66ab    |
| Pinot Noir         | VCR9  | 37.32±3.79defgh | 56.5±4.95d    | 47.46±7.72cd   | 82.43±3.43ab | 59.67±9.43ab |
|                    | 375   | 61.5±2.12abc    | 57.5±3.54cd   | 30.14±2.63efgh | 84.93±0.1a   | 54.5±7.78ab  |
|                    | VCR18 | 35.82±1.67efgh  | 51.96±1.35d   | 41±1.41cdef    | 81.93±4.14ab | 0±0          |
|                    | 792   | 31.64±4.75gh    | 67.14±3.03bcd | 38±4.24cdef    | 80.5±0.71ab  | 41±16.97b    |
| Cabernet Franc     | VCR10 | 49.5±10.61cdef  | 17.75±9.54e   | 64.12±1.24ab   | 77±2.83ab    | 55.22±3.14ab |
|                    | 215   | 65.16±4.46abc   | 83.32±3.28ab  | 26±2.83fghi    | 80.32±1.87ab | 50.16±4.01ab |
|                    | 678   | 53.78±3.94bcd   | 77.14±2.63ab  | 41.21±1.72cde  | 81±4.24ab    | 39.71±3.24b  |
|                    | 396   | 48±4.24cdefg    | 79±2.83ab     | 21.5±3.54ghi   | 80±1.41ab    | 53.96±1.47ab |
| Cabernet Sauvignon | 15    | 33.32±1.87fgh   | 85.82±0.26a   | 76.73±1.03a    | 81.32±0.46a  | 0±0          |
| Sauvignon          | 169   | 24±5.66h        | 84±5.66ab     | 53±5.66bc      | 69.5±2.12b   | 73.45±3.46a  |
|                    | 170   | 69.86±1.21ab    | 88±4.24a      | 35±7.07defg    | 80±5.66ab    | 66±8.49ab    |
|                    | VCR11 | 50.99±2.84cde   | 85.5±7.78a    | 40.41±0.58cdef | 79.33±6.13ab | 56.5±9.19ab  |
| Malbec             | 598   | 65.04±2.89abc   | 75±7.07abc    | 52±4.24bc      | 85.82±5.9a   | 41.5±4.95b   |
|                    | VCR6  | 73±4.24a        | 90.01±1.43a   | 0±0            | 80.03±1.46ab | 70.09±1.54a  |

<sup>a</sup> Values with different letters (a-j) in a column indicate a significant difference, using ANOVA and Duncan's test, ( $p < 0.05$ ).
