# Supplementary material
Source: MDPI journal article supplement (https://www.mdpi.com/2311-5637/8/10/501)
Supplement: s1 [file s1 › Table S4 The correlation coefficients of PLSR between wine volatiles and sensory odor descriptors.pdf]

Table S4 The correlation coefficients of PLSR between wine volatiles and sensory odor descriptors.

| Components           | Number | Merlot       | Cabernet            | Pinot          | Malbec        |               | Cabernet      |               |
|----------------------|--------|--------------|---------------------|----------------|---------------|---------------|---------------|---------------|
|                      |        | floral       | Sauvignon<br>floral | Noir<br>floral | floral        | spice         | black berry   | black berry   |
| ethyl acetate        | C1     | 0.033        | <b>0.099</b>        | -0.134         | <b>0.049</b>  | 0.056         | 0.057         | <b>-0.148</b> |
| isobutyl acetate     | C2     | <b>0.061</b> | -0.011              | <b>0.284</b>   | <b>-0.059</b> | <b>-0.058</b> | <b>-0.058</b> | <b>-0.165</b> |
| ethyl butyrate       | C3     | 0.038        | <b>0.077</b>        | 0.025          | 0.000         | 0.009         | 0.007         | <b>-0.154</b> |
| isoamyl acetate      | C4     | <b>0.065</b> | <b>-0.121</b>       | 0.066          | <b>-0.058</b> | <b>-0.058</b> | <b>-0.059</b> | -0.046        |
| isobutanol           | C5     | -0.012       | <b>-0.106</b>       | <b>0.223</b>   | <b>-0.059</b> | <b>-0.058</b> | <b>-0.058</b> | -0.029        |
| 1-butanol            | C6     | -0.072       | -0.008              | <b>0.068</b>   | -0.059        | <b>-0.056</b> | <b>-0.055</b> | -0.042        |
| isoamyl alcohol      | C7     | 0.037        | <b>-0.087</b>       | -0.081         | <b>-0.059</b> | <b>-0.058</b> | <b>-0.058</b> | 0.121         |
| ethyl caproate       | C8     | <b>0.061</b> | <b>0.069</b>        | <b>0.089</b>   | 0.034         | 0.034         | 0.031         | -0.009        |
| ethyl lactate        | C9     | -0.039       | -0.011              | 0.086          | 0.021         | 0.032         | 0.036         | -0.035        |
| ethyl octanoate      | C10    | <b>0.059</b> | 0.025               | 0.048          | 0.037         | 0.040         | 0.038         | <b>-0.088</b> |
| decanal              | C11    | 0.086        | 0.032               | 0.04           | 0.033         | 0.031         | 0.027         | -0.091        |
| isobutyric acid      | C12    | -0.063       | <b>-0.058</b>       | <b>0.282</b>   | <b>-0.056</b> | <b>-0.058</b> | <b>-0.058</b> | 0.068         |
| ethyl decanoate      | C13    | <b>0.052</b> | -0.013              | -0.024         | -0.049        | -0.045        | -0.047        | 0.004         |
| isovaleric acid      | C14    | -0.069       | <b>-0.073</b>       | -0.037         | <b>-0.058</b> | <b>-0.058</b> | <b>-0.057</b> | <b>0.065</b>  |
| ethyl 9-decenoate    | C15    | <b>0.060</b> | <b>0.038</b>        | -0.116         | <b>0.056</b>  | <b>0.057</b>  | <b>0.056</b>  | <b>-0.129</b> |
| hexanoic acid        | C16    | 0.013        | <b>0.093</b>        | 0.053          | 0.053         | 0.056         | 0.057         | -0.005        |
| 2-phenylethanol      | C17    | -0.074       | -0.069              | -0.05          | <b>-0.056</b> | <b>-0.058</b> | <b>-0.058</b> | <b>0.093</b>  |
| octanoic acid        | C18    | -0.078       | 0.048               | 0.041          | -0.058        | -0.052        | -0.051        | -0.100        |
| decanoic acid        | C19    | -0.085       | 0.065               | 0.064          | -0.018        | -0.028        | -0.027        | -0.062        |
| $\beta$ -damascenone | C20    | 0.003        | 0.014               | -0.114         | -0.050        | -0.041        | -0.041        | -0.022        |
| hexyl alcohol        | C21    | <b>0.062</b> | <b>0.116</b>        | <b>-0.295</b>  | <b>0.056</b>  | <b>0.059</b>  | <b>0.058</b>  | -0.055        |
| (Z)-3-hexen-1-ol     | C22    | <b>0.067</b> | <b>0.121</b>        | 0.033          | <b>0.057</b>  | <b>0.059</b>  | <b>0.059</b>  | <b>0.126</b>  |
| geraniol             | C23    | 0.006        | 0.000               | -0.193         | -0.058        | -0.053        | -0.053        | -0.148        |
